# Supplementary material for: Terrestrial mammalian wildlife responses to Unmanned Aerial Systems approaches
Source: PubMed Central journal article supplement (PMC6375938; doi:10.1038/s41598-019-38610-x), 2019-02-14
Supplement: 41598_2019_38610_MOESM1_ESM.pdf [file 41598_2019_38610_MOESM1_ESM.pdf]

Terrestrial mammalian wildlife responses to Unmanned Aerial Systems approaches

Emily Bennitt<sup>1\*</sup>, Hattie L.A. Bartlam-Brooks<sup>2</sup>, Tatjana Y. Hubel<sup>2</sup> and Alan M. Wilson<sup>2</sup>

<sup>1</sup>Okavango Research Institute, University of Botswana, Maun, Botswana

<sup>2</sup>Structure and Motion Laboratory, Royal Veterinary College, University of London, United Kingdom

\*Correspondence author: Emily Bennitt; Okavango Research Institute, Private Bag 285, Maun, Botswana; ebennitt@ub.ac.bw

Supplementary Table S1. Competitive ( $\Delta AIC \leq 2$ ) and null models explaining wildlife responses to vertical and horizontal approaches by Unmanned Aerial Systems (UAS). AIC = Akaike's Information Criterion;  $\omega$  = AIC weights;  $k$  = number of parameters.

| Approach | Response           | Model                                                  | $\Delta AIC$ | $\omega$ | $k$ | Deviance |
|----------|--------------------|--------------------------------------------------------|--------------|----------|-----|----------|
| Vertical | None vs. Any       | Altitude + Distance + Size + Species                   | 0.00         | 0.35     | 5   | 157      |
|          |                    | Altitude + Distance + Species                          | 0.09         | 0.34     | 4   | 159      |
|          |                    | Altitude + Distance + Species + Time of Day            | 1.41         | 0.17     | 5   | 156      |
|          |                    | Altitude + Distance + Habitat + Size + Species         | 1.89         | 0.14     | 6   | 157      |
|          |                    | Null model                                             | 170.50       | 0.00     | 1   | 347      |
|          | Vigilant vs. Avoid | Altitude + Distance + Species                          | 0.00         | 0.18     | 4   | 196      |
|          |                    | Altitude + Distance + Species + Time of Day            | 0.14         | 0.17     | 5   | 192      |
|          |                    | Altitude +Dir+ Distance + Species + Time of Day        | 0.87         | 0.12     | 6   | 186      |
|          |                    | Altitude + Distance + Species + Time of Day + UAS type | 0.99         | 0.11     | 6   | 190      |
|          |                    | Altitude + Species                                     | 1.28         | 0.10     | 3   | 200      |
|          |                    | Altitude + Distance + UAS type                         | 1.28         | 0.10     | 4   | 195      |
|          |                    | Altitude + Distance + Habitat + Species                | 1.62         | 0.08     | 5   | 196      |
|          |                    | Activity + Altitude + Distance + Species               | 1.95         | 0.07     | 5   | 189      |

---

|            |              |                                                                             |      |      |   |     |
|------------|--------------|-----------------------------------------------------------------------------|------|------|---|-----|
|            |              | Altitude + Direction + Distance + Species                                   | 1.98 | 0.07 | 5 | 191 |
|            |              | Null model                                                                  | 3.00 | 0.00 | 1 | 217 |
| Horizontal | None vs. Any | Altitude + Distance + Species                                               | 0.00 | 0.09 | 4 | 221 |
|            |              | Altitude + Distance + Previous exposure + Species + Time of Day             | 0.25 | 0.08 | 6 | 215 |
|            |              | Altitude + Distance + Species + Time of Day                                 | 0.40 | 0.08 | 5 | 217 |
|            |              | Altitude + Distance + Previous exposure + Species                           | 0.47 | 0.07 | 5 | 219 |
|            |              | Altitude + Distance + Size + Species                                        | 0.57 | 0.07 | 5 | 219 |
|            |              | Altitude + Distance + Habitat + Species                                     | 0.58 | 0.07 | 5 | 219 |
|            |              | Altitude + Distance + Habitat + Previous exposure + Species + Time of Day   | 0.67 | 0.07 | 7 | 213 |
|            |              | Altitude + Distance + Habitat + Previous exposure + Species                 | 0.70 | 0.06 | 6 | 217 |
|            |              | Altitude + Distance + Habitat + Herd size + Species                         | 0.86 | 0.06 | 6 | 218 |
|            |              | Altitude + Distance + Habitat + Previous exposure + Herd size + Species     | 1.11 | 0.05 | 7 | 216 |
|            |              | Altitude + Distance + Previous exposure + Herd size + Species               | 1.19 | 0.05 | 6 | 218 |
|            |              | Altitude + Distance + Habitat + Species + Time of Day                       | 1.20 | 0.05 | 6 | 216 |
|            |              | Altitude + Distance + Previous exposure + Herd size + Species + Time of Day | 1.62 | 0.04 | 7 | 214 |
|            |              | Altitude + Distance + Herd size + Species + Time of Day                     | 1.63 | 0.04 | 6 | 216 |

---

---

|                    |                                                                                       |       |      |   |     |
|--------------------|---------------------------------------------------------------------------------------|-------|------|---|-----|
|                    | Activity + Altitude + Distance + Species                                              | 1.64  | 0.04 | 5 | 214 |
|                    | Altitude + Distance + Species + UAS type                                              | 1.76  | 0.04 | 5 | 221 |
|                    | Altitude + Distance + Habitat + Previous exposure + Herd size + Species + Time of Day | 1.79  | 0.04 | 8 | 212 |
|                    | Null model                                                                            | 175.2 | 0.00 | 1 | 413 |
| Vigilant vs. Avoid | Distance + Habitat + Species                                                          | 0.00  | 0.37 | 4 | 169 |
|                    | Distance +Herd Type+ Habitat + Species                                                | 0.59  | 0.27 | 5 | 167 |
|                    | Distance + Habitat + Previous + Species                                               | 1.31  | 0.19 | 5 | 168 |
|                    | Distance + Habitat + Species + UAS type                                               | 1.58  | 0.17 | 5 | 168 |
|                    | Null model                                                                            | 27.00 | 0.00 | 1 | 212 |

---
